# Supplementary material
Source: Springer Nature journal article supplement (https://www.springermedizin.de/resource/supplementary/12936_2010_1304_MOESM1_ESM.pdf/9549456)
Supplement: MOESM1 [file 9549456]

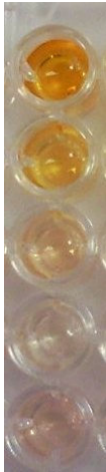

Control 1 – Normal

Control 2 – Moderately deficient

Control 3 – Severely Deficient

Control 4 – Severely Deficient

Deficient sample
